# Supplementary material for: A silver nanowire mesh overcoated protection layer with graphene oxide as a transparent electrode for flexible organic solar cells
Source: Royal Society of Chemistry journal article supplement (doi:10.1039/c7ra10889c), 2017-01-01
Supplement: c7ra10889c1.pdf [file c7ra10889c1.pdf]

## SUPPORTING INFORMATION

# **Silver nanowire mesh overcoated protection layer with graphene oxide as a transparent electrode for flexible organic solar cells**

Byung-Yong Wang,<sup>a</sup> Eung-Seok Lee,<sup>a</sup> Young-Jei Oh<sup>b</sup>

and Hyun Wook Kang<sup>c†</sup>

<sup>a</sup> Center for Semiconductor Technology, Korea University, 145 Anam-ro, Seongbuk-gu, Seoul, 02841, Republic of Korea.

<sup>b</sup> Opto Electronic Materials and Devices Center, Korea Institute of Science and Technology, 5 Hwarang-ro 14-gil, Seongbuk-gu, Seoul 02792, Republic of Korea.

<sup>c</sup> Department of Mechanical Engineering, Chonnam National University, 77 Yongbong-ro, Buk-gu, Gwangju 61186, Republic of Korea.

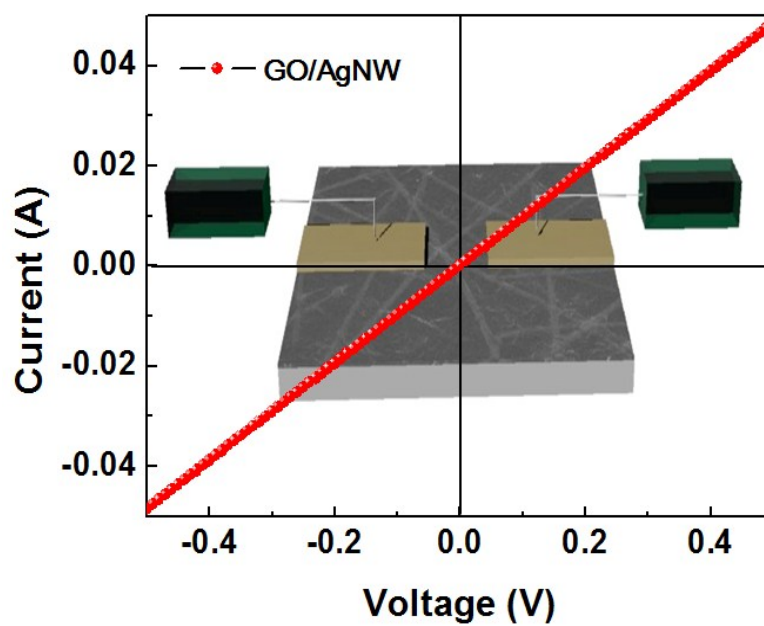

**SI 1.** Schematic diagram of the Au/GO/AgNW/PET device; the current between the two Au electrodes is a linear function of the applied voltage, which indicates excellent ohmic transport through the GO OCL.

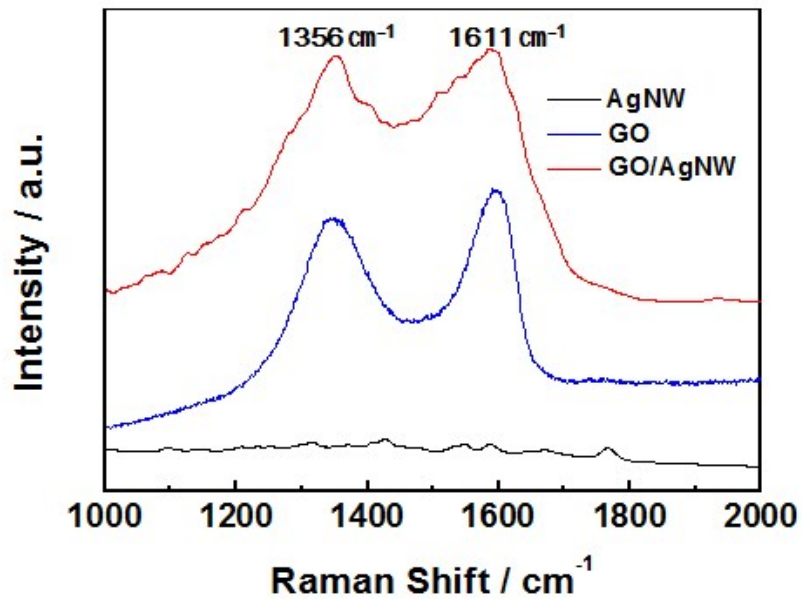

**SI 2.** Raman spectra before and after applying the GO coating to the AgNW film on the PET substrate.

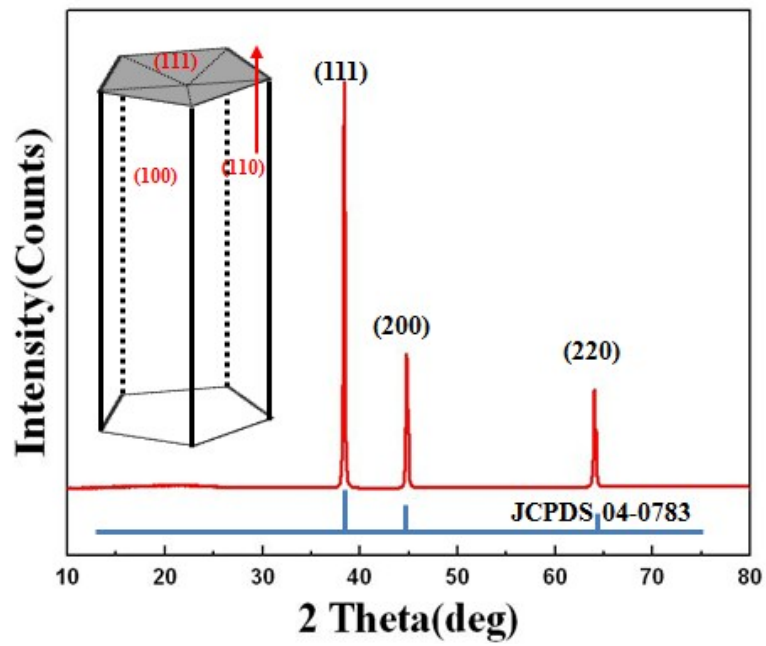

**SI 3.** X-ray diffraction (XRD) pattern of the synthesized AgNW and the standard powder pattern of Ag from JCPDS No. 04-0783.

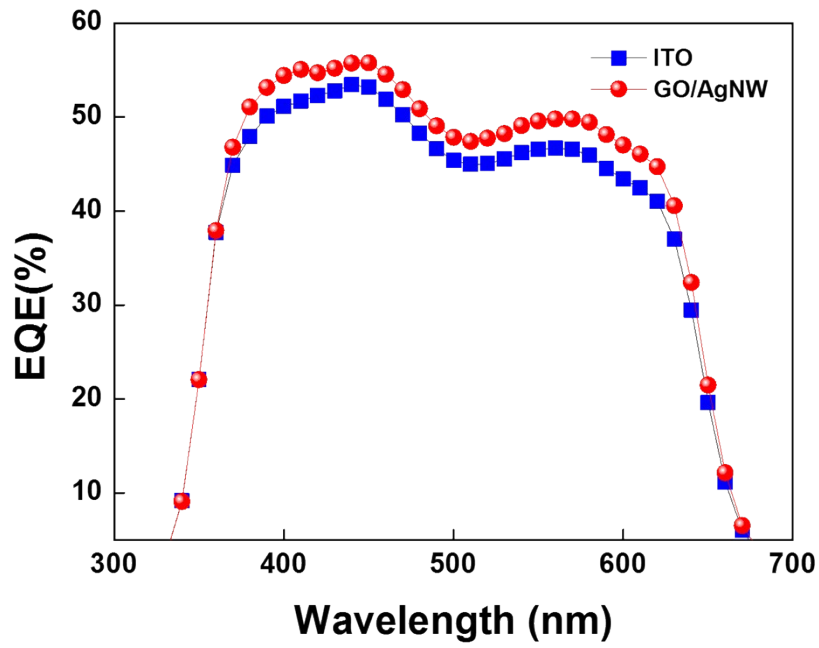

**SI 4.** EQE spectra of an OSC with the GO/Ag NW electrode and the reference device with the ITO electrode under AM 1.5 G illumination with 100 mW/cm<sup>2</sup> intensity.
